# Supplementary material
Source: PubMed Central journal article supplement (PMC5438156)

## Supporting Information

**Table S1.** CAT gene family of *Paracoccidioides* and related fungi.

| <b>Species</b>         | <b>Strain</b> | <b>CATA</b> | <b>CATP</b>             | <b>CATB</b> |
|------------------------|---------------|-------------|-------------------------|-------------|
| <i>P. brasiliensis</i> | Pb03 (PS2)    | PABG_04351  | PABG_01943              | PABG_03611  |
|                        | Pb18 (S1)     | PADG_04740  | PADG_00324              | PADG_00225  |
|                        | Pb300 (PS4)   | ACO22_00116 | ACO22_07355             | ACO22_05319 |
|                        | PbCNH (PS3)   | GX48_01151  | GX48_05139              | GX48_03408  |
| <i>P. lutzii</i>       | Pb01          | PAAG_04580  | PAAG_01454              | PAAG_01553  |
| <i>H. capsulatum</i>   | G186AR        | HCBG_02841  | HCBG_07136              | HCBG_08399  |
| <i>B. dermatitidis</i> | ATCC26199     | BDFG_08520  | BDFG_02965              | BDFG_07613  |
| <i>C. Immitis</i>      | RS            | CIMG_10158  | CIMG_04336              | -           |
| <i>C. posadasii</i>    | CBS 113859    | CPSG_04574  | CPSG_09625              | -           |
| <i>Ustilago reesii</i> | UAMH1704      | UREG_03559  | UREG_01586              | -           |
| <i>T. rubrum</i>       | CBS118892     | TERG_01252  | TERG_02005,TERG_06053   | -           |
| <i>M. gypseum</i>      | CBS118893     | MGYG_00280  | MGYG_05107,MGYG_05911   | -           |
| <i>A. fumigatus</i>    | AF293         | Afu6g03890  | Afu2g18030              | Afu3g02270  |
| <i>A. flavus</i>       | NRRL3357      | AFLA_056170 | AFLA_034380,AFLA_100250 | AFLA_090690 |
| <i>A. nidulans</i>     | FGSC_A4       | AN8637      | AN5918                  | AN9339      |

**Table S2.** qPCR primers used in this study.

| <b>Gene</b>              | <b>Sequence 5' → 3'</b>        |
|--------------------------|--------------------------------|
| <b>CATA</b> (PABG_04351) | F: 5'TGTTTATGTGGGCCATGTCTG 3'  |
|                          | R: 5'ATGTGTTGACGCCAAATCCC 3'   |
| <b>CATB</b> (PABG_03611) | F: 5'TGTGGGTGATGTCTGGAAATGG 3' |
|                          | R: 5'CGGAATGTATGAACACCGAACC 3' |
| <b>CATP</b> (PABG_01943) | F: 5'AATTGGGACTGGGTCTTCAA 3'   |
|                          | R: 5'AGGAACTTTGATGGATCACG 3'   |
| <b>AOX</b> (PABG_01661)  | F: 5'CTTGGGAGCAAGAGGTGCT 3'    |
|                          | R: 5'AGGGCTGGGAAATATTCTTTG 3'  |
| <b>GSH</b> (PABG_06731)  | F: 5' AAGCACGGATGAATCATGGC 3'  |
|                          | R: 5' TCCAGAGATTTGCGACGAAG 3'  |

|                                |                                |
|--------------------------------|--------------------------------|
| <b>TEF3</b> (PABG_05066)       | F: 5'TTTCTTGCCCAAGCTCATGC 3'   |
|                                | R: 5'CCTTGTTTGGTCTTCTCACGTG 3' |
| <b>β-Tubuline</b> (PABG_00486) | F: 5'TCCCTTTGGCGAACTCTTTC 3'   |
|                                | R: 5'TTGTTTCCAGCACCAGACTG 3'   |

**Figure S1: Validation via PCR of the presence and integration of the Transfer DNA (T-DNA) into the genome of *P. brasiliensis*.** Genomic DNA from the PbWT60855, PbEV60855 and the knockdown strain *PbCATP*-aRNA were tested by PCR using specific primers for the tubulin gene (*TUB*) and for the hygromycin B resistance gene (*HPH*).

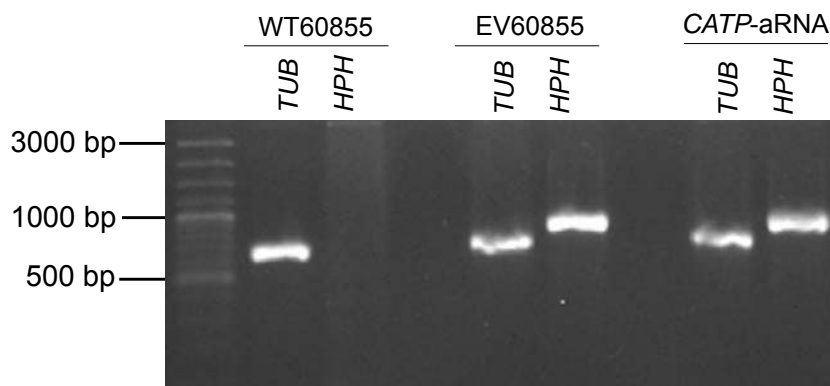

**Figure S2:** Gene expression levels for *CATP*, *AOX* and *GSH* in PbWT and *PbCATP*-aRNA yeast cells upon interaction with human PMNs (PMN-Pb). Gene expression levels were determined by RT-qPCR assay and normalized with the housekeeping gene  $\beta$ -tubulin. Results represent the mean of three individual experiments.

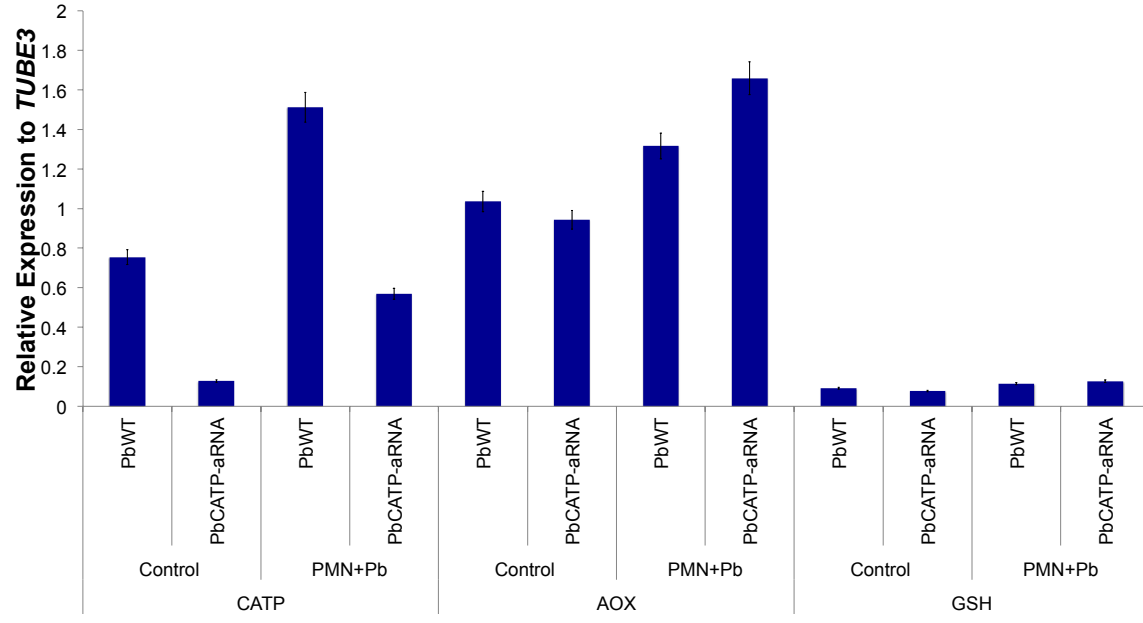

Supplement: NIHMS856858-supplement-supplement_1.pdf [file NIHMS856858-supplement-supplement_1.pdf]
